# Supplementary material
Source: publisher site journal article supplement (https://www.dovepress.com/article/323471)
Supplement: Supplementary file 1 [file get_supplementary_file.php]

**Supplemental table 1 – database searches**

**Database searches**

**Search terms found in ‘Title/ abstract’**

**Abstract available**

**English abstract**

**Year published 2011-2021 ( last 10 years)**

**Database: Pubmed**

| Search Term(s) | Results (No. of articles) | Date of search |
| --- | --- | --- |
| Mobile phone application And psoriasis | 0 | November 2021 |
| App and psoriasis | 18 | November 2021 |
| Teledermatology and psoriasis | 26 | November 2021 |
| Telemedicine and psoriasis | 22 | November 2021 |
| Artificial Intelligence and psoriasis | 23 | November 2021 |
| AI and psoriasis | 27 | November 2021 |
| Machine learning and psoriasis | 44 | November 2021 |
| Mobile and applications and dermatology | 43 | November 2021 |
| Mobile and applications and psoriasis | 5 | November 2021 |
| Mobile and psoriasis | 49 | November 2021 |
| Smartphone and dermatology | 233 | November 2021 |

**Database: Google Scholar**

| Search Term(s) | Results (No. of articles) | Date of search |
| --- | --- | --- |
| Mobile phone application, psoriasis | 0 | November 2021 |
| App, psoriasis | 15 | November 2021 |
| Teledermatology, psoriasis | 4 | November 2021 |
| Telemedicine and psoriasis | 4 | November 2021 |
| Artificial Intelligence, psoriasis | 4 | November 2021 |
| AI, psoriasis | 5 | November 2021 |
| Machine learning, psoriasis | 34 | November 2021 |
| Mobile, applications, dermatology | 17 | November 2021 |
| Mobile, applications, psoriasis | 0 | November 2021 |
| Mobile, psoriasis | 6 | November 2021 |
| Smartphone and dermatology | 12 | November 2021 |

**Database Scopus:**

| Search Term(s) | Results (No. of articles) | Date of search |
| --- | --- | --- |
| Mobile phone application And psoriasis | 14 | November 2021 |
| App and psoriasis | 36 | November 2021 |
| Teledermatology and psoriasis | 91 | November 2021 |
| Telemedicine and psoriasis | 109 | November 2021 |
| Artificial Intelligence and psoriasis | 66 | November 2021 |
| AI and psoriasis | 67 | November 2021 |
| Machine learning and psoriasis | 124 | November 2021 |
| Mobile and applications and dermatology | 306 | November 2021 |
| Mobile and applications and psoriasis | 48 | November 2021 |
| Mobile and psoriasis | 103 | November 2021 |
| Smartphone and dermatology | 235 | November 2021 |

**Supplemental table 2 – mobile phone apps search**

Supplementary material 2

Database: The App Annie platform ( [www.appannie.com](http://www.appannie.com)) was searched on 10th November 2021 for freely available apps on IOS and Google Play operating systems which contained the word ‘psoriasis’ in their title.

| App Name | IOS (23) | Google Play (32) |
| --- | --- | --- |
| SymTrac Psoriasis | ✓ | ✓ |
| Psoriasis Forum | ✓ | ✓ |
| Psoriasis LITE patient | ✓ | ✓ |
| Vik Psoriasis | ✓ | ✓ |
| Psoriasis Telehealth | ✓ |  |
| Psoriasis Manager | ✓ |  |
| MDi Psoriasis | ✓ | ✓ |
| Psoriasis Monitor | ✓ | ✓ |
| Guia Psoriasis | ✓ | ✓ |
| Psoriasis Treatment Decisions | ✓ |  |
| DLQI 4 Psoriasis | ✓ | ✓ |
| Psoriasis App | Sorea | ✓ | ✓ |
| Psoriasis Social Network | ✓ |  |
| P.S.O Psoriasis Arztfinder | ✓ | ✓ |
| Beat-Psoriasis: AI management | ✓ |  |
| Psoriasis Health Storylines | ✓ |  |
| ITCHY – Psoriasis & Eczema | ✓ | ✓ |
| Kopa by Happify | ✓ |  |
| Psoriasis Deep Dive | ✓ |  |
| Psoriasis Area Severity Index | ✓ | ✓ |
| Psoriasis LITE site | ✓ |  |
| PsoriasisBox | ✓ | ✓ |
| Psoriasislitto | ✓ | ✓ |
| Psoriasis (focus medica) |  | ✓ |
| Psoriasis (Hanmant Renushe) |  | ✓ |
| Psoriasis Calc |  | ✓ |
| Psoriasis Support |  | ✓ |
| Psoriasis Diet – psoriasis food control |  | ✓ |
| Psoriasis Advice |  | ✓ |
| Scalp psoriasis guide |  | ✓ |
| Psoriasis Treatment Strategy |  | ✓ |
| Methods of treatment of psoriasis |  | ✓ |
| Home remedies for psoriasis |  | ✓ |
| Psoriasis disease guide |  | ✓ |
| Psoriasis support KR |  | ✓ |
| Nature and history of psoriasis |  | ✓ |
| AI psoriasis App: Manage and Care |  | ✓ |
| Psoriasis & Cure |  | ✓ |
| PASI Calculator |  | ✓ |
| Scalp psoriasis Guide ( everyone learning Apps) |  | ✓ |
| Natural treatments for psoriasis |  | ✓ |
